# Supplementary material for: Impact of Primary Tumor Location on Demographics, Resectability, Outcomes, and Quality of Life in Finnish Metastatic Colorectal Cancer Patients (Subgroup Analysis of the RAXO Study)
Source: MDPI journal article supplement (doi:10.3390/cancers16051052), 2024-03-05
Supplement: s1 [file s1]

**Table S1.** Laboratory findings in right colon, left colon and rectal primary tumor location

|                                      |                             | Total  |       | Right colon |      | Left colon |      | Rectum |      | P-value* |
|--------------------------------------|-----------------------------|--------|-------|-------------|------|------------|------|--------|------|----------|
|                                      |                             | N=1080 | 100 % | 310         | 29 % | 396        | 37 % | 374    | 35 % |          |
| Haemoglobin                          | ≥11 g/dL                    | 917    | 83 %  | 233         | 74 % | 344        | 86 % | 340    | 87 % | <0.001   |
|                                      | <11 g/dL                    | 193    | 17 %  | 84          | 26 % | 58         | 14 % | 51     | 13 % |          |
| Leucocytes                           | ≤10 ^9/L                    | 919    | 83 %  | 261         | 82 % | 332        | 83 % | 326    | 83 % | 0.927    |
|                                      | >10 ^9/L                    | 191    | 17 %  | 56          | 18 % | 70         | 17 % | 65     | 17 % |          |
| Thrombocytes                         | ≤400 ^9/L                   | 813    | 73 %  | 227         | 72 % | 287        | 71 % | 299    | 76 % | 0.201    |
|                                      | >400 ^9/L                   | 297    | 27 %  | 90          | 28 % | 115        | 29 % | 92     | 24 % |          |
| Neutrophils                          | ≤6.7 ^9/L                   | 836    | 84 %  | 244         | 85 % | 305        | 83 % | 287    | 83 % | 0.726    |
|                                      | >6.7 ^9/L                   | 164    | 16 %  | 43          | 15 % | 61         | 17 % | 60     | 17 % |          |
| C-reactive protein                   | ≤10 mg/L                    | 489    | 54 %  | 149         | 56 % | 170        | 52 % | 170    | 54 % | 0.581    |
|                                      | >10 mg/L                    | 417    | 46 %  | 117         | 44 % | 158        | 48 % | 142    | 46 % |          |
| Albumin                              | ≥30 g/L                     | 544    | 84 %  | 166         | 83 % | 206        | 84 % | 172    | 83 % | 0.922    |
|                                      | <30 g/L                     | 106    | 16 %  | 33          | 17 % | 38         | 16 % | 35     | 17 % |          |
| Estimated glomerular filtration rate | ≥90 ml/min/1.73m2           | 484    | 44 %  | 126         | 40 % | 194        | 49 % | 164    | 43 % | 0.076    |
|                                      | 60-89 ml/min/1.73m2         | 433    | 40 %  | 123         | 39 % | 145        | 37 % | 165    | 43 % |          |
|                                      | 30-59 ml/min/1.73m2         | 170    | 16 %  | 63          | 20 % | 54         | 14 % | 53     | 14 % |          |
|                                      | <30 ml/min/1.73m2           | 5      | 0 %   | 1           | 0 %  | 2          | 1 %  | 2      | 1 %  |          |
| Alkaline phosphatase                 | ≤105 U/L                    | 720    | 66 %  | 201         | 64 % | 249        | 62 % | 270    | 70 % | 0.065    |
|                                      | >105 U/L                    | 379    | 34 %  | 112         | 36 % | 151        | 38 % | 116    | 30 % |          |
| Alanine amino transferase            | Under upper limit of normal | 895    | 83 %  | 253         | 82 % | 325        | 82 % | 317    | 84 % | 0.600    |
|                                      | Over upper limit of normal  | 187    | 17 %  | 56          | 18 % | 72         | 18 % | 59     | 16 % |          |
| Hyperbilirubinemia                   | ≤25 µmol/L                  | 884    | 85 %  | 247         | 83 % | 329        | 86 % | 308    | 85 % | 0.671    |
|                                      | >25 µmol/L                  | 157    | 15 %  | 49          | 17 % | 54         | 14 % | 54     | 15 % |          |
| Carcinoembyonic antigen              | ≤5 µ/L                      | 316    | 29 %  | 102         | 33 % | 105        | 27 % | 109    | 29 % | 0.194    |
|                                      | >5 µ/L                      | 773    | 71 %  | 210         | 67 % | 291        | 73 % | 272    | 71 % |          |
| Cancer antigen 19-9                  | ≤26 kU/L                    | 297    | 46 %  | 85          | 42 % | 102        | 44 % | 110    | 51 % | 0.134    |
|                                      | >26 kU/L                    | 350    | 54 %  | 116         | 58 % | 130        | 56 % | 104    | 49 % |          |

\* Crosstabs was calculated for right colon vs left colon vs rectum and all alternatives with percentages presented for each demographic factor

**Table S2.** Univariable and multivariable Cox regression model for overall survival using only baseline factors

|                            |                             | N    | Univariable |           |         | Multivariable |           |         |
|----------------------------|-----------------------------|------|-------------|-----------|---------|---------------|-----------|---------|
|                            |                             |      | HR          | 95% CI    | p-value | HR            | 95% CI    | p-value |
| Age                        |                             | 1080 | 1.02        | 1.01-1.02 | <0.001  | 1.00          | 0.99-1.01 | 0.616   |
| Primary tumor location     | Right colon                 | 310  | 1           |           |         | 1             |           |         |
|                            | Left colon                  | 396  | 0.57        | 0.47-0.68 | <0.001  | 0.69          | 0.57-0.83 | <0.001  |
|                            | Rectum                      | 374  | 0.61        | 0.51-0.73 | <0.001  | 0.63          | 0.51-0.76 | <0.001  |
| Number of metastatic sites | 1                           | 582  | 1           |           |         | 1             |           |         |
|                            | 2                           | 317  | 1.86        | 1.58-2.19 | <0.001  | 1.23          | 1.04-1.47 | 0.018   |
|                            | 3-5                         | 181  | 2.62        | 2.16-3.17 | <0.001  | 1.62          | 1.32-1.97 | <0.001  |
| ECOG Performance status    | 0                           | 294  | 1           |           |         | 1             |           |         |
|                            | 1                           | 598  | 1.77        | 1.47-2.13 | <0.001  | 1.56          | 1.30-1.88 | <0.001  |
|                            | 2-3                         | 188  | 3.72        | 2.98-4.65 | <0.001  | 2.78          | 2.20-3.50 | <0.001  |
| Upfront resectability      | Upfront resectable          | 309  | 1           |           |         | 1             |           |         |
|                            | Borderline resectable       | 179  | 1.43        | 1.11-1.86 | <0.001  | 1.29          | 0.99-1.68 | 0.058   |
|                            | Un-resectable               | 592  | 4.65        | 3.82-5.67 | <0.001  | 3.53          | 2.85-4.37 | <0.001  |
| Mutation groups            | <i>RAS</i> & <i>BRAF</i> wt | 354  | 1           |           |         | 1             |           |         |
|                            | <i>RAS</i> mt               | 553  | 1.46        | 1.23-1.73 | <0.001  | 1.22          | 1.03-1.45 | 0.021   |
|                            | <i>BRAF</i> -V600E mt       | 99   | 3.13        | 2.42-4.04 | <0.001  | 1.85          | 1.44-2.39 | <0.001  |
|                            | ( <i>K</i> ) <i>RAS</i> wt  | 59   | 2.96        | 2.19-4.00 | <0.001  | 2.01          | 1.50-2.69 | <0.001  |
|                            | Not tested                  | 15   | 2.48        | 1.38-4.44 | 0.002   | 2.38          | 1.32-4.28 | 0.004   |
| MMR-status                 | pMMR                        | 410  | 1           |           |         | 1             |           |         |
|                            | dMMR                        | 14   | 1.06        | 0.55-2.07 | 0.857   | 0.86          | 0.46-1.59 | 0.620   |
|                            | Not tested                  | 656  | 1.35        | 1.16-1.57 | <0.001  | 1.08          | 0.93-1.27 | 0.321   |

dMMR=deficient mismatch repair, ECOG=European Cooperative Oncology Group, LAT=local ablative therapy,

MMR=mismatch repair, pMMR=proficient mismatch repair

**Table S3.** Health-related quality of life indexes in different treatment phases according to primary tumor location

|                      |                      | Right colon |      | Left colon |      | Rectum |      |
|----------------------|----------------------|-------------|------|------------|------|--------|------|
|                      |                      | Mean        | SD   | Mean       | SD   | Mean   | SD   |
| Post-resection       | 15D index            | 0.86        | 0.10 | 0.85       | 0.10 | 0.91   | 0.06 |
|                      | EQ-5D index          | 0.76        | 0.20 | 0.83       | 0.13 | 0.90   | 0.13 |
|                      | EQ-5D VAS            | 69          | 15   | 73         | 16   | 80     | 10   |
|                      | Global health status | 73          | 22   | 74         | 20   | 78     | 15   |
| Remission            | 15D index            | 0.91        | 0.08 | 0.90       | 0.08 | 0.89   | 0.11 |
|                      | EQ-5D index          | 0.87        | 0.13 | 0.87       | 0.13 | 0.88   | 0.13 |
|                      | EQ-5D VAS            | 76          | 15   | 79         | 14   | 79     | 13   |
|                      | Global health status | 77          | 16   | 77         | 19   | 76     | 17   |
| Systemic therapy     | 15D index            | 0.86        | 0.09 | 0.87       | 0.09 | 0.86   | 0.09 |
|                      | EQ-5D index          | 0.80        | 0.17 | 0.81       | 0.16 | 0.81   | 0.16 |
|                      | EQ-5D VAS            | 69          | 15   | 71         | 16   | 69     | 15   |
|                      | Global health status | 66          | 20   | 69         | 16   | 68     | 17   |
| Best supportive care | 15D index            | 0.73        | 0.10 | 0.80       | 0.12 | 0.72   | 0.13 |
|                      | EQ-5D index          | 0.61        | 0.28 | 0.71       | 0.21 | 0.59   | 0.35 |
|                      | EQ-5D VAS            | 55          | 21   | 55         | 18   | 58     | 19   |
|                      | Global health status | 45          | 25   | 57         | 20   | 55     | 19   |

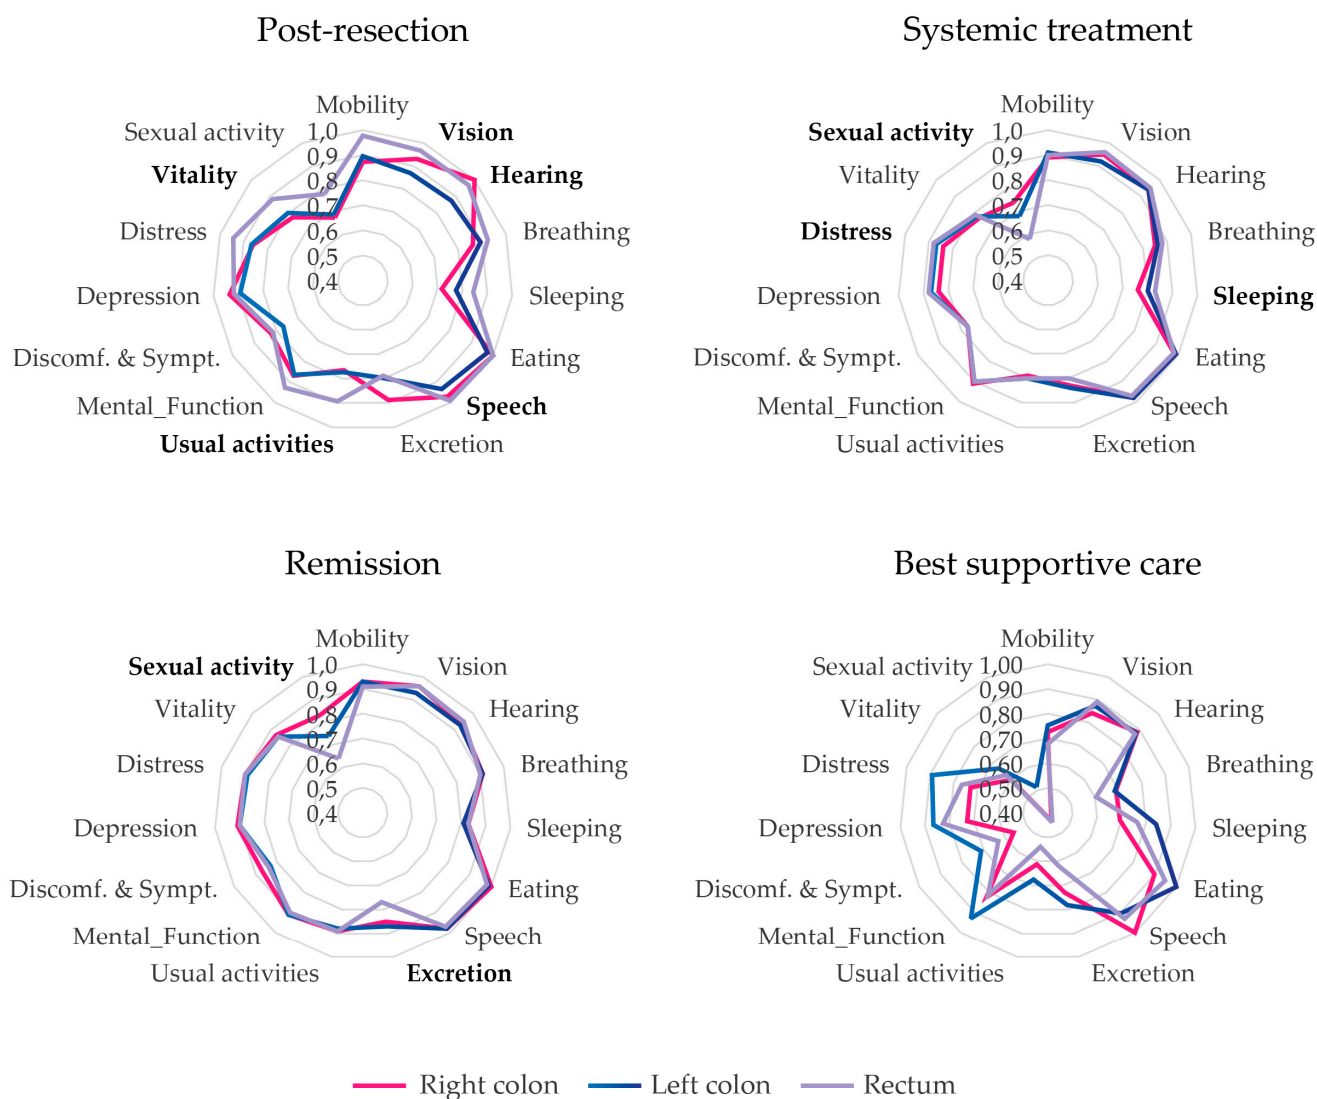

**Figure S1.** The mean 15D dimensions in different treatment phases for right colon, left colon, and rectal primary tumor location
